# Supplementary material
Source: PubMed Central journal article supplement (PMC3742023)
Supplement: NIHMS62758-supplement-1si20070730_04.pdf [file NIHMS62758-supplement-1si20070730_04.pdf]

# Supporting Information

## Experimental and DFT Studies: Novel Structural Modifications Greatly Enhance the Solvent Sensitivity of Live Cell Imaging Dyes

**Alexei Toutchkine<sup>1,2</sup>, Wen-Ge Han<sup>2,3</sup>, Matthias Ullmann<sup>4</sup>, Tiqing Liu<sup>5</sup>, Donald Bashford<sup>6</sup>, Louis Noodleman\*<sup>3</sup> and Klaus M. Hahn\*<sup>1</sup>**

<sup>1</sup> Department of Pharmacology and Lineberger Cancer Center, University of North Carolina at Chapel Hill, Chapel Hill, North Carolina 27599, USA

<sup>2</sup>These authors contributed equally to this work.

<sup>3</sup> Department of Molecular Biology, TPC-15, The Scripps Research Institute, 10550 North Torrey Pines Road, La Jolla, California 92037, USA

<sup>4</sup> Structural Biology, University of Bayreuth, Universitätsstr. 30, BGI, 95447 Bayreuth, Germany

<sup>5</sup> University of Maryland Biotechnology Institute, Center for Advanced Research in Biotechnology, 9600 Gudelsky Dr., Rockville, MD 20850, USA

<sup>6</sup> Hartwell Center, St. Jude Children's Research Hospital, 332 N. Lauderdale St. Memphis, TN 38105, USA

\* Corresponding authors. E-mail: [khahn@med.unc.edu](mailto:khahn@med.unc.edu), [lou@scripps.edu](mailto:lou@scripps.edu).

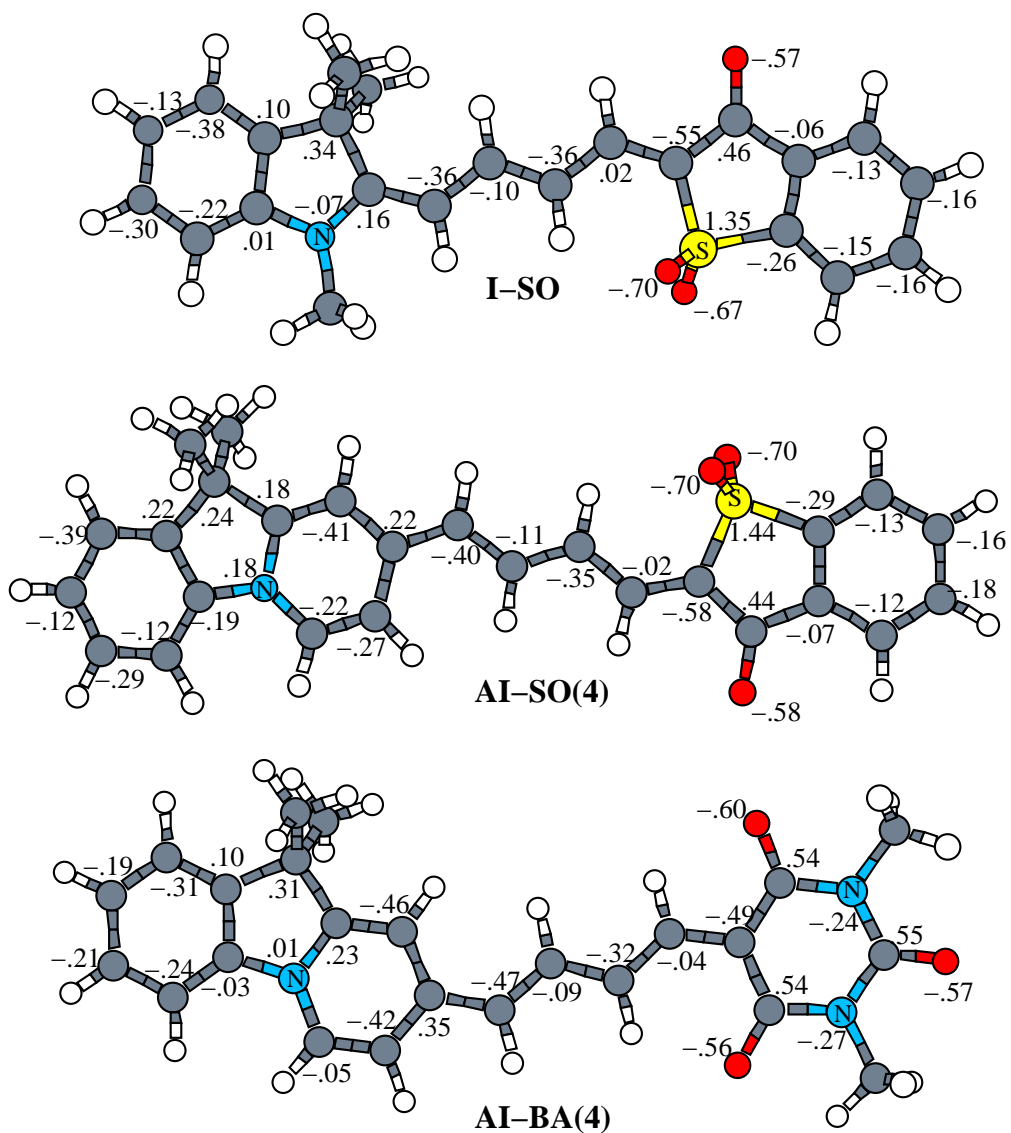

**Figure S1.** Atomic ESP charges of the ground state I-SO, AI-SO(4) and AI-BA(4) dyes in MeOH.

Cartesian coordinates of COSMO optimized  $S_0$  state I-SO in  $C_6H_6$ :

|   |           |           |           |   |           |           |           |
|---|-----------|-----------|-----------|---|-----------|-----------|-----------|
| C | 3.770719  | -0.064592 | -5.335505 | C | -1.076782 | -0.357886 | -4.516484 |
| C | 2.607601  | -0.117777 | -4.575924 | C | 3.097539  | -1.281894 | -2.388573 |
| C | 1.362787  | -0.223022 | -5.212411 | C | 2.932351  | 1.256965  | -2.485240 |
| C | 1.239937  | -0.282096 | -6.602351 | H | 4.748102  | 0.019202  | -4.856840 |
| C | 2.420626  | -0.227312 | -7.356427 | H | 4.575568  | -0.077658 | -7.344792 |
| C | 3.672170  | -0.119311 | -6.736758 | H | 2.357106  | -0.269966 | -8.443918 |
| C | 2.403644  | -0.076042 | -3.068242 | H | 0.271339  | -0.367181 | -7.094245 |
| C | 0.875825  | -0.171937 | -2.965562 | H | -1.008043 | -0.279260 | -1.999155 |
| N | 0.350854  | -0.249888 | -4.230852 | H | 1.545371  | -0.022484 | -0.256278 |
| C | 0.068484  | -0.191306 | -1.838943 | H | -1.473909 | -0.246733 | 0.316177  |
| C | 0.484585  | -0.115175 | -0.495468 | H | 1.029798  | 0.002111  | 2.161751  |
| C | -0.412603 | -0.156173 | 0.556133  | H | -0.937168 | 0.066333  | 7.195769  |
| C | -0.032438 | -0.089689 | 1.905903  | H | -5.167418 | -0.321979 | 4.510671  |
| C | -0.910535 | -0.123068 | 2.972765  | H | -3.170491 | -0.041683 | 8.345163  |
| C | -0.569433 | -0.020064 | 4.386588  | H | -5.259178 | -0.242652 | 7.015784  |
| C | -1.809767 | -0.060324 | 5.227660  | H | -1.233234 | -0.316704 | -5.598411 |
| C | -3.004286 | -0.159290 | 4.499276  | H | -1.475891 | -1.309218 | -4.132741 |
| S | -2.671667 | -0.184578 | 2.743788  | H | -1.621402 | 0.474778  | -4.048248 |
| C | -4.255940 | -0.231322 | 5.104285  | H | 4.181383  | -1.231357 | -2.572923 |
| C | -4.295732 | -0.188589 | 6.505242  | H | 2.933123  | -1.273733 | -1.301605 |
| C | -3.112488 | -0.076978 | 7.255199  | H | 2.720259  | -2.235183 | -2.788842 |
| C | -1.864076 | -0.014631 | 6.624695  | H | 2.766988  | 1.310680  | -1.399707 |
| O | 0.579142  | 0.093390  | 4.846612  | H | 4.014177  | 1.333688  | -2.672600 |
| O | -3.130843 | 1.058477  | 2.076452  | H | 2.436011  | 2.120027  | -2.954488 |
| O | -3.142087 | -1.473370 | 2.138678  |   |           |           |           |

Cartesian coordinates of COSMO optimized  $S_1$  state I-SO in  $C_6H_6$ :

|   |           |           |           |   |           |           |           |
|---|-----------|-----------|-----------|---|-----------|-----------|-----------|
| C | 3.773368  | -0.054528 | -5.352390 | S | -2.691802 | -0.176536 | 2.763959  |
| C | 2.612591  | -0.109769 | -4.591179 | C | -4.273958 | -0.223942 | 5.130442  |
| C | 1.361520  | -0.226030 | -5.228601 | C | -4.307217 | -0.185766 | 6.535604  |
| C | 1.240887  | -0.293365 | -6.624469 | C | -3.117509 | -0.072657 | 7.274443  |
| C | 2.418929  | -0.235956 | -7.374230 | C | -1.872280 | -0.009237 | 6.636981  |
| C | 3.672973  | -0.117278 | -6.752679 | O | 0.577031  | 0.048032  | 4.849297  |
| C | 2.414392  | -0.064279 | -3.085547 | O | -3.132336 | 1.064955  | 2.084655  |
| C | 0.894791  | -0.169977 | -2.981239 | O | -3.135343 | -1.463667 | 2.148942  |
| N | 0.359380  | -0.255903 | -4.255012 | C | -1.067235 | -0.376987 | -4.542492 |
| C | 0.087199  | -0.194505 | -1.837629 | C | 3.123227  | -1.264168 | -2.405262 |
| C | 0.511207  | -0.116431 | -0.504045 | C | 2.945159  | 1.272178  | -2.503917 |
| C | -0.400182 | -0.165348 | 0.568242  | H | 4.750903  | 0.036210  | -4.875827 |
| C | -0.029983 | -0.096606 | 1.912102  | H | 4.575473  | -0.073836 | -7.361889 |
| C | -0.930065 | -0.122103 | 2.990531  | H | 2.359570  | -0.284863 | -8.461559 |
| C | -0.592361 | -0.034165 | 4.398254  | H | 0.273918  | -0.387551 | -7.117174 |
| C | -1.821440 | -0.056076 | 5.236702  | H | -0.990394 | -0.288398 | -1.995695 |
| C | -3.028174 | -0.150337 | 4.518844  | H | 1.569683  | -0.015166 | -0.265322 |

|   |           |           |           |   |           |           |           |
|---|-----------|-----------|-----------|---|-----------|-----------|-----------|
| H | -1.460029 | -0.261942 | 0.320202  | H | -1.617798 | 0.456421  | -4.083292 |
| H | 1.028746  | -0.007163 | 2.181575  | H | 4.206590  | -1.203212 | -2.588930 |
| H | -0.942258 | 0.070247  | 7.203596  | H | 2.957724  | -1.258425 | -1.318851 |
| H | -5.189442 | -0.312968 | 4.542740  | H | 2.754659  | -2.220638 | -2.806545 |
| H | -3.166143 | -0.040198 | 8.365344  | H | 2.777279  | 1.326359  | -1.419164 |
| H | -5.266635 | -0.245082 | 7.053024  | H | 4.027662  | 1.346857  | -2.688055 |
| H | -1.221026 | -0.348321 | -5.624972 | H | 2.450140  | 2.134373  | -2.975894 |
| H | -1.457281 | -1.328085 | -4.149824 |   |           |           |           |

Cartesian coordinates of COSMO optimized  $S_0$  state I-SO in MeOH:

|   |           |           |           |   |           |           |           |
|---|-----------|-----------|-----------|---|-----------|-----------|-----------|
| C | 3.782573  | -0.060421 | -5.351389 | C | -1.063730 | -0.362770 | -4.521541 |
| C | 2.621188  | -0.114303 | -4.586551 | C | 3.120389  | -1.274543 | -2.401053 |
| C | 1.375445  | -0.222549 | -5.218722 | C | 2.941585  | 1.265719  | -2.499492 |
| C | 1.240864  | -0.283845 | -6.607450 | H | 4.762766  | 0.025674  | -4.879530 |
| C | 2.418070  | -0.229120 | -7.367076 | H | 4.573662  | -0.076561 | -7.365471 |
| C | 3.673653  | -0.118164 | -6.752076 | H | 2.349643  | -0.273911 | -8.454126 |
| C | 2.419575  | -0.071748 | -3.079845 | H | 0.269484  | -0.370802 | -7.092774 |
| C | 0.893737  | -0.175448 | -2.976425 | H | -0.997640 | -0.296339 | -2.014667 |
| N | 0.366486  | -0.251670 | -4.229652 | H | 1.543001  | -0.031334 | -0.257233 |
| C | 0.076431  | -0.202837 | -1.843141 | H | -1.484939 | -0.269689 | 0.294508  |
| C | 0.485081  | -0.129719 | -0.507053 | H | 1.014286  | -0.017363 | 2.139429  |
| C | -0.426940 | -0.174305 | 0.548388  | H | -0.932585 | 0.060001  | 7.203877  |
| C | -0.050725 | -0.100986 | 1.890493  | H | -5.184687 | -0.311435 | 4.545349  |
| C | -0.926138 | -0.120810 | 2.976932  | H | -3.152360 | -0.058337 | 8.362464  |
| C | -0.584119 | -0.020453 | 4.378903  | H | -5.252609 | -0.253252 | 7.050221  |
| C | -1.814918 | -0.056114 | 5.233772  | H | -1.212850 | -0.323201 | -5.603699 |
| C | -3.018319 | -0.151721 | 4.516902  | H | -1.455466 | -1.315539 | -4.138141 |
| S | -2.683251 | -0.174424 | 2.765437  | H | -1.607411 | 0.470123  | -4.055778 |
| C | -4.266236 | -0.226181 | 5.128721  | H | 4.202047  | -1.217906 | -2.594668 |
| C | -4.293705 | -0.193353 | 6.532202  | H | 2.965054  | -1.260789 | -1.312915 |
| C | -3.104406 | -0.085634 | 7.271841  | H | 2.742122  | -2.229042 | -2.797899 |
| C | -1.859139 | -0.017646 | 6.631520  | H | 2.783862  | 1.315673  | -1.412697 |
| O | 0.574433  | 0.084271  | 4.841990  | H | 4.021570  | 1.345449  | -2.694464 |
| O | -3.155929 | 1.062088  | 2.085543  | H | 2.437078  | 2.124998  | -2.967644 |
| O | -3.148404 | -1.456570 | 2.144359  |   |           |           |           |

Cartesian coordinates of COSMO optimized  $S_1$  state I-SO in MeOH:

|   |          |           |           |   |           |           |           |
|---|----------|-----------|-----------|---|-----------|-----------|-----------|
| C | 3.780386 | -0.053181 | -5.356241 | C | 0.092651  | -0.209337 | -1.851104 |
| C | 2.621250 | -0.108933 | -4.592328 | C | 0.510019  | -0.130920 | -0.502484 |
| C | 1.367293 | -0.226657 | -5.227859 | C | -0.407665 | -0.175091 | 0.547202  |
| C | 1.239389 | -0.292922 | -6.624845 | C | -0.044035 | -0.101794 | 1.907110  |
| C | 2.414659 | -0.235718 | -7.376673 | C | -0.934197 | -0.116208 | 2.983551  |
| C | 3.672228 | -0.116968 | -6.756741 | C | -0.600694 | -0.032942 | 4.393290  |
| C | 2.425257 | -0.063311 | -3.087353 | C | -1.816760 | -0.057740 | 5.235579  |
| C | 0.904932 | -0.178088 | -2.981959 | C | -3.032955 | -0.151251 | 4.526441  |
| N | 0.368591 | -0.260938 | -4.257284 | S | -2.700224 | -0.167162 | 2.775445  |

|   |           |           |           |   |           |           |           |
|---|-----------|-----------|-----------|---|-----------|-----------|-----------|
| C | -4.276301 | -0.225679 | 5.142399  | H | -1.464760 | -0.271125 | 0.286453  |
| C | -4.302439 | -0.191723 | 6.549300  | H | 1.016953  | -0.019634 | 2.168258  |
| C | -3.107254 | -0.080645 | 7.280959  | H | -0.936846 | 0.065132  | 7.209135  |
| C | -1.864706 | -0.014181 | 6.638810  | H | -5.196810 | -0.309978 | 4.562005  |
| O | 0.580143  | 0.046620  | 4.842527  | H | -3.149040 | -0.051601 | 8.372129  |
| O | -3.161516 | 1.078586  | 2.105864  | H | -5.258784 | -0.252461 | 7.071647  |
| O | -3.151426 | -1.447047 | 2.142998  | H | -1.211845 | -0.350824 | -5.627723 |
| C | -1.059024 | -0.381454 | -4.546045 | H | -1.443922 | -1.333512 | -4.153150 |
| C | 3.145804  | -1.255773 | -2.407665 | H | -1.605948 | 0.451075  | -4.082794 |
| C | 2.946074  | 1.278300  | -2.509393 | H | 4.226609  | -1.186246 | -2.602073 |
| H | 4.760186  | 0.038191  | -4.884985 | H | 2.992120  | -1.241739 | -1.319489 |
| H | 4.572411  | -0.074391 | -7.369585 | H | 2.778476  | -2.216039 | -2.801221 |
| H | 2.353344  | -0.284598 | -8.463867 | H | 2.785961  | 1.327577  | -1.423074 |
| H | 0.269766  | -0.386241 | -7.111669 | H | 4.026478  | 1.360524  | -2.701240 |
| H | -0.982847 | -0.306447 | -2.017084 | H | 2.439442  | 2.135489  | -2.978838 |
| H | 1.567084  | -0.030127 | -0.256082 |   |           |           |           |

Cartesian coordinates of COSMO optimized  $S_0$  state I-TBA in  $C_6H_6$ :

|   |           |           |           |   |           |           |           |
|---|-----------|-----------|-----------|---|-----------|-----------|-----------|
| C | 0.021860  | -0.113643 | -0.020694 | H | 3.927601  | 3.021219  | -0.208514 |
| C | 1.411080  | -0.047037 | 0.001792  | H | -0.493692 | -1.075417 | -0.008958 |
| C | 2.049591  | 1.199454  | -0.015784 | H | -1.805016 | 1.045924  | -0.077804 |
| C | 1.338980  | 2.401025  | -0.049751 | H | -0.644192 | 3.240982  | -0.099567 |
| C | -0.060671 | 2.320418  | -0.072378 | H | 1.837639  | 3.369817  | -0.056482 |
| C | -0.715773 | 1.082191  | -0.059293 | H | 5.864250  | -0.022037 | 0.103579  |
| C | 2.456533  | -1.151166 | 0.046802  | H | 4.755279  | -2.914576 | 0.127808  |
| C | 3.760423  | -0.337947 | 0.052956  | H | 7.636805  | -1.785540 | 0.155785  |
| N | 3.447369  | 0.992915  | 0.005962  | H | 6.294414  | -4.583888 | 0.192430  |
| C | 5.080574  | -0.782369 | 0.095354  | H | 5.169078  | 1.894084  | -0.814867 |
| C | 5.504100  | -2.120017 | 0.127898  | H | 4.962003  | 2.134888  | 0.950638  |
| C | 6.836983  | -2.523287 | 0.157393  | H | 10.546008 | -8.519615 | 0.341059  |
| C | 7.140013  | -3.886680 | 0.188572  | H | 8.970562  | -8.436459 | 1.213726  |
| C | 8.386036  | -4.528575 | 0.220479  | H | 8.989647  | -8.473598 | -0.569009 |
| C | 9.649337  | -3.814840 | 0.218768  | H | 11.891539 | -2.836477 | 0.252353  |
| N | 10.836080 | -4.622137 | 0.267119  | H | 12.679985 | -4.160715 | 1.189669  |
| C | 10.849599 | -6.003284 | 0.299923  | H | 12.720552 | -4.197683 | -0.591250 |
| N | 9.611549  | -6.652661 | 0.290627  | C | 2.347957  | -2.046838 | -1.212341 |
| C | 8.361272  | -5.986826 | 0.255268  | C | 2.292070  | -1.992867 | 1.335741  |
| O | 9.759579  | -2.579186 | 0.179520  | H | 1.304283  | -2.478133 | 1.328214  |
| O | 7.324006  | -6.670704 | 0.255783  | H | 3.058937  | -2.777265 | 1.403627  |
| C | 9.527659  | -8.123617 | 0.321242  | H | 2.361401  | -1.360653 | 2.233974  |
| S | 12.332081 | -6.860895 | 0.348285  | H | 1.362855  | -2.537547 | -1.225689 |
| C | 12.122543 | -3.904259 | 0.280306  | H | 2.451309  | -1.451290 | -2.132171 |
| C | 4.438070  | 2.073587  | -0.014764 | H | 3.120853  | -2.828181 | -1.216707 |

Cartesian coordinates of COSMO optimized  $S_1$  state I-TBA in  $C_6H_6$ :

|   |           |          |           |   |          |          |           |
|---|-----------|----------|-----------|---|----------|----------|-----------|
| C | -0.008740 | 0.074435 | -0.080964 | C | 1.379142 | 0.031633 | -0.027569 |
|---|-----------|----------|-----------|---|----------|----------|-----------|

|   |           |           |           |   |           |           |           |
|---|-----------|-----------|-----------|---|-----------|-----------|-----------|
| C | 2.117142  | 1.231966  | -0.036805 | H | -0.597202 | -0.844679 | -0.074530 |
| C | 1.493732  | 2.487539  | -0.094918 | H | -1.739843 | 1.370363  | -0.184199 |
| C | 0.097336  | 2.511362  | -0.148502 | H | -0.416141 | 3.472054  | -0.193770 |
| C | -0.651789 | 1.323433  | -0.142853 | H | 2.063426  | 3.416140  | -0.095446 |
| C | 2.331803  | -1.151424 | 0.045229  | H | 5.803136  | -0.269725 | 0.203572  |
| C | 3.686939  | -0.443236 | 0.088640  | H | 4.570629  | -3.114230 | 0.227444  |
| N | 3.478036  | 0.927606  | 0.021303  | H | 7.470767  | -1.992918 | 0.326452  |
| C | 4.975089  | -0.983358 | 0.180040  | H | 6.255362  | -4.843896 | 0.347197  |
| C | 5.337127  | -2.338388 | 0.243747  | H | 5.282269  | 1.693039  | -0.757970 |
| C | 6.685805  | -2.749049 | 0.314646  | H | 5.050538  | 1.951291  | 1.001798  |
| C | 7.050514  | -4.093189 | 0.355167  | H | 10.787064 | -8.476013 | 0.340259  |
| C | 8.362300  | -4.645040 | 0.378565  | H | 9.228871  | -8.514608 | 1.250013  |
| C | 9.573437  | -3.847632 | 0.389759  | H | 9.208916  | -8.508136 | -0.532059 |
| N | 10.807092 | -4.570622 | 0.350019  | H | 11.732276 | -2.714235 | 0.325199  |
| C | 10.916174 | -5.945606 | 0.333250  | H | 12.650669 | -3.989260 | 1.208438  |
| N | 9.732390  | -6.672162 | 0.360560  | H | 12.620164 | -4.002795 | -0.573687 |
| C | 8.443296  | -6.097301 | 0.382627  | C | 2.188980  | -2.046005 | -1.214268 |
| O | 9.594994  | -2.602163 | 0.425887  | C | 2.066583  | -1.987928 | 1.322824  |
| O | 7.448936  | -6.847791 | 0.401080  | H | 1.050743  | -2.409743 | 1.279944  |
| C | 9.745487  | -8.146156 | 0.354578  | H | 2.779591  | -2.820107 | 1.407356  |
| S | 12.460057 | -6.700838 | 0.282385  | H | 2.148180  | -1.366942 | 2.227912  |
| C | 12.039818 | -3.763028 | 0.325711  | H | 1.175309  | -2.474262 | -1.245755 |
| C | 4.546805  | 1.928665  | 0.023675  | H | 2.350638  | -1.464222 | -2.134462 |
| H | 4.115782  | 2.912562  | -0.181691 | H | 2.911594  | -2.874221 | -1.194700 |

Cartesian coordinates of COSMO optimized  $S_0$  state I-TBA in MeOH:

|   |           |           |           |   |           |           |           |
|---|-----------|-----------|-----------|---|-----------|-----------|-----------|
| C | 3.146891  | -0.242862 | -5.788235 | C | 0.544509  | 0.267925  | 6.557778  |
| C | 2.049386  | -0.200437 | -4.933194 | S | -2.471214 | 0.251694  | 7.172420  |
| C | 0.753482  | -0.266842 | -5.460824 | C | -4.019870 | 0.132328  | 4.642417  |
| C | 0.503184  | -0.384824 | -6.829224 | C | -1.629904 | -0.228382 | -4.577184 |
| C | 1.616416  | -0.429718 | -7.680146 | H | -1.855125 | -0.131623 | -5.642291 |
| C | 2.921465  | -0.357798 | -7.171386 | H | 4.165404  | -0.191510 | -5.400131 |
| C | 1.970953  | -0.090783 | -3.419324 | H | 3.769637  | -0.394143 | -7.855007 |
| C | 0.454553  | -0.119310 | -3.191908 | H | 1.458523  | -0.523850 | -8.754743 |
| N | -0.173082 | -0.200873 | -4.394559 | H | -0.507632 | -0.445561 | -7.231064 |
| C | -0.270954 | -0.075808 | -1.993753 | H | -1.358652 | -0.121785 | -2.075252 |
| C | 0.252788  | 0.008574  | -0.703188 | H | 1.333625  | 0.055583  | -0.554737 |
| C | -0.553907 | 0.033537  | 0.443636  | H | -1.635160 | -0.004664 | 0.333281  |
| C | 0.015916  | 0.098114  | 1.709988  | H | 1.108713  | 0.127930  | 1.762350  |
| C | -0.619875 | 0.127186  | 2.973910  | H | -2.086182 | 0.611485  | -4.038025 |
| C | -2.055668 | 0.113030  | 3.135242  | H | -2.041006 | -1.175826 | -4.202029 |
| N | -2.554563 | 0.149416  | 4.478871  | H | -0.051200 | 0.302500  | 7.472657  |
| C | -1.763735 | 0.202047  | 5.602400  | H | 1.186098  | -0.622362 | 6.551365  |
| N | -0.380591 | 0.213558  | 5.409938  | H | 1.173629  | 1.163184  | 6.475194  |
| C | 0.241187  | 0.175971  | 4.139532  | H | -4.455280 | 0.089124  | 3.641526  |
| O | -2.871758 | 0.073485  | 2.194006  | H | -4.317445 | -0.744923 | 5.229841  |
| O | 1.489477  | 0.186818  | 4.094408  | H | -4.345851 | 1.040174  | 5.164639  |

|   |          |           |           |   |          |           |           |
|---|----------|-----------|-----------|---|----------|-----------|-----------|
| C | 2.585717 | 1.248609  | -2.941219 | H | 2.264273 | -2.247856 | -3.105846 |
| C | 2.683039 | -1.292870 | -2.752556 | H | 3.657681 | 1.260867  | -3.190344 |
| H | 3.752655 | -1.263204 | -3.010286 | H | 2.101006 | 2.104173  | -3.436591 |
| H | 2.593182 | -1.253519 | -1.657729 | H | 2.482539 | 1.368103  | -1.853118 |

Cartesian coordinates of COSMO optimized  $S_1$  state I-TBA in MeOH:

|   |           |           |           |   |           |           |           |
|---|-----------|-----------|-----------|---|-----------|-----------|-----------|
| C | 3.136689  | -0.251689 | -5.797133 | H | -1.870239 | -0.126922 | -5.665974 |
| C | 2.041932  | -0.197641 | -4.943457 | H | 4.155080  | -0.206860 | -5.408034 |
| C | 0.734948  | -0.258764 | -5.472532 | H | 3.761825  | -0.417120 | -7.862629 |
| C | 0.492330  | -0.378330 | -6.851310 | H | 1.452299  | -0.529056 | -8.769473 |
| C | 1.604585  | -0.431902 | -7.694295 | H | -0.517310 | -0.433931 | -7.256117 |
| C | 2.912976  | -0.369983 | -7.180672 | H | -1.342390 | -0.111161 | -2.073110 |
| C | 1.972974  | -0.084104 | -3.430655 | H | 1.369011  | 0.066142  | -0.560228 |
| C | 0.460852  | -0.107163 | -3.198800 | H | -1.596175 | -0.021129 | 0.338200  |
| N | -0.182053 | -0.189335 | -4.427872 | H | 1.136008  | 0.126373  | 1.802946  |
| C | -0.252657 | -0.067402 | -2.003449 | H | -2.091637 | 0.620052  | -4.060653 |
| C | 0.288569  | 0.014265  | -0.698392 | H | -2.044470 | -1.166054 | -4.219810 |
| C | -0.514299 | 0.024795  | 0.447483  | H | -0.063239 | 0.293480  | 7.492754  |
| C | 0.045801  | 0.088383  | 1.736099  | H | 1.184294  | -0.610706 | 6.561950  |
| C | -0.614237 | 0.113324  | 2.988335  | H | 1.151352  | 1.174252  | 6.499086  |
| C | -2.056175 | 0.084081  | 3.148432  | H | -4.454791 | 0.120245  | 3.633821  |
| N | -2.557020 | 0.149733  | 4.481733  | H | -4.338569 | -0.723305 | 5.217761  |
| C | -1.773527 | 0.208405  | 5.614347  | H | -4.337101 | 1.062588  | 5.162560  |
| N | -0.391289 | 0.213700  | 5.428193  | C | 2.606758  | 1.249235  | -2.954353 |
| C | 0.235033  | 0.173841  | 4.168506  | C | 2.689205  | -1.287665 | -2.766904 |
| O | -2.860761 | 0.008838  | 2.193890  | H | 3.761708  | -1.250123 | -3.010522 |
| O | 1.486262  | 0.190097  | 4.119825  | H | 2.586424  | -1.259235 | -1.673209 |
| C | 0.532026  | 0.271566  | 6.577493  | H | 2.279592  | -2.242172 | -3.132353 |
| S | -2.490402 | 0.270954  | 7.183692  | H | 3.682851  | 1.243069  | -3.185361 |
| C | -4.024321 | 0.152378  | 4.637112  | H | 2.142991  | 2.109863  | -3.460773 |
| C | -1.636052 | -0.219282 | -4.602402 | H | 2.489920  | 1.377150  | -1.868811 |

Cartesian coordinates of COSMO optimized  $S_0$  state AI-SO(4) in  $C_6H_6$ :

|   |           |            |           |   |           |           |           |
|---|-----------|------------|-----------|---|-----------|-----------|-----------|
| C | 7.636499  | -12.427668 | -1.011976 | C | 4.235371  | -3.096818 | -0.067858 |
| C | 7.616310  | -11.038856 | -0.855477 | C | 4.547717  | -1.703143 | 0.100943  |
| C | 8.824664  | -10.342401 | -0.737909 | C | 3.564359  | -0.754511 | 0.174681  |
| C | 10.062466 | -10.976047 | -0.769610 | N | 2.227198  | -1.125367 | 0.084618  |
| C | 10.070673 | -12.368540 | -0.926795 | C | 1.871490  | -2.443534 | -0.075527 |
| C | 8.869996  | -13.085097 | -1.046576 | C | 2.831156  | -3.413883 | -0.150469 |
| C | 6.398659  | -10.172191 | -0.797418 | C | 1.381723  | 0.011639  | 0.187227  |
| C | 6.764898  | -8.774368  | -0.627920 | C | 2.186219  | 1.150474  | 0.344673  |
| S | 8.528051  | -8.583546  | -0.549254 | C | 3.662766  | 0.757760  | 0.351551  |
| C | 5.856773  | -7.731083  | -0.539526 | C | 1.581257  | 2.401434  | 0.467368  |
| C | 6.116758  | -6.364406  | -0.376672 | C | 0.178124  | 2.486366  | 0.431011  |
| C | 5.084745  | -5.430470  | -0.304221 | C | -0.606118 | 1.332693  | 0.274694  |
| C | 5.268411  | -4.057045  | -0.142463 | C | -0.014014 | 0.067019  | 0.149268  |

|   |           |            |           |   |           |            |           |
|---|-----------|------------|-----------|---|-----------|------------|-----------|
| C | 4.436547  | 1.404080   | -0.822932 | H | 10.990346 | -10.412429 | -0.675989 |
| C | 4.347628  | 1.118602   | 1.692256  | H | 8.902099  | -14.168306 | -1.168442 |
| O | 9.059301  | -7.848190  | -1.707911 | H | 11.022619 | -12.899073 | -0.956042 |
| O | 8.979773  | -8.126775  | 0.774522  | H | 4.411805  | 2.500453   | -0.726622 |
| O | 5.236575  | -10.609056 | -0.884624 | H | 5.488295  | 1.079476   | -0.811856 |
| H | 2.182991  | 3.305783   | 0.590536  | H | 3.993559  | 1.128451   | -1.792212 |
| H | -0.306697 | 3.459899   | 0.525881  | H | 5.400807  | 0.798367   | 1.679840  |
| H | -1.694464 | 1.416047   | 0.249847  | H | 4.320636  | 2.209261   | 1.840712  |
| H | -0.626050 | -0.828604  | 0.027961  | H | 3.842632  | 0.636785   | 2.543120  |
| H | 5.592801  | -1.393690  | 0.172591  | H | 2.497739  | -4.444228  | -0.276209 |
| H | 6.293469  | -3.682893  | -0.066059 | H | 0.805363  | -2.656316  | -0.134442 |
| H | 4.066763  | -5.823381  | -0.381869 | H | 7.148936  | -6.014766  | -0.303719 |
| H | 6.696445  | -12.971540 | -1.104184 | H | 4.809650  | -8.047885  | -0.609444 |

Cartesian coordinates of COSMO optimized  $S_1$  state AI-SO(4) in  $C_6H_6$ :

|   |           |            |           |   |           |            |           |
|---|-----------|------------|-----------|---|-----------|------------|-----------|
| c | 0.005204  | 0.079633   | 0.034860  | o | 9.040157  | -7.814494  | -1.719767 |
| c | 1.402917  | 0.043564   | 0.008364  | o | 9.015005  | -8.048436  | 0.770680  |
| c | 2.197613  | 1.201283   | 0.056198  | o | 5.293281  | -10.644948 | -0.718189 |
| c | 1.579601  | 2.445619   | 0.132234  | c | 4.396119  | 1.416981   | -1.214249 |
| c | 0.175020  | 2.510202   | 0.159426  | c | 4.406349  | 1.266128   | 1.312892  |
| c | -0.597384 | 1.339506   | 0.111880  | h | 2.169588  | 3.362782   | 0.170941  |
| c | 3.676506  | 0.825849   | 0.020854  | h | -0.319543 | 3.479347   | 0.219653  |
| c | 3.591491  | -0.692393  | -0.065514 | h | -1.685054 | 1.407466   | 0.135502  |
| n | 2.247040  | -1.080586  | -0.064505 | h | -0.595474 | -0.828608  | -0.002067 |
| c | 4.572108  | -1.645912  | -0.133656 | h | 5.617482  | -1.334350  | -0.134218 |
| c | 4.249804  | -3.039402  | -0.203769 | h | 6.310840  | -3.667126  | -0.262528 |
| c | 2.855488  | -3.373932  | -0.195862 | h | 4.053301  | -5.802304  | -0.379106 |
| c | 1.887776  | -2.412735  | -0.127455 | h | 6.803659  | -12.995226 | -0.869397 |
| c | 5.279970  | -4.028481  | -0.274835 | h | 11.059203 | -10.328121 | -0.673415 |
| c | 5.076016  | -5.413830  | -0.358418 | h | 9.034381  | -14.149923 | -0.940917 |
| c | 6.114401  | -6.368192  | -0.420961 | h | 11.137889 | -12.830319 | -0.845571 |
| c | 5.858406  | -7.742723  | -0.511230 | h | 4.392256  | 2.516364   | -1.158690 |
| c | 6.795134  | -8.777927  | -0.576594 | h | 5.443108  | 1.078022   | -1.242962 |
| s | 8.561692  | -8.546048  | -0.536680 | h | 3.902925  | 1.111447   | -2.149108 |
| c | 8.891275  | -10.306856 | -0.681908 | h | 5.453125  | 0.925852   | 1.294369  |
| c | 7.687551  | -11.029863 | -0.735297 | h | 4.401465  | 2.364369   | 1.388669  |
| c | 6.460055  | -10.193768 | -0.680329 | h | 3.918162  | 0.851176   | 2.207449  |
| c | 10.140581 | -10.916015 | -0.718956 | h | 2.532466  | -4.412054  | -0.242318 |
| c | 10.174815 | -12.317138 | -0.814158 | h | 0.824649  | -2.632620  | -0.119041 |
| c | 8.983585  | -13.061101 | -0.868192 | h | 7.149885  | -6.013241  | -0.399354 |
| c | 7.735792  | -12.428254 | -0.829623 | h | 4.814134  | -8.077646  | -0.538121 |

Cartesian coordinates of COSMO optimized  $S_0$  state AI-SO(4) in MeOH:

|   |          |            |           |   |           |            |           |
|---|----------|------------|-----------|---|-----------|------------|-----------|
| C | 7.639216 | -12.429535 | -1.011998 | C | 10.068693 | -10.977636 | -0.768772 |
| C | 7.617650 | -11.041158 | -0.855498 | C | 10.076409 | -12.372261 | -0.926506 |
| C | 8.829469 | -10.348849 | -0.737761 | C | 8.875533  | -13.086805 | -1.046448 |



|   |           |            |           |   |           |            |           |
|---|-----------|------------|-----------|---|-----------|------------|-----------|
| C | 6.406218  | -10.166256 | -0.796633 | O | 8.982415  | -8.121186  | 0.768675  |
| C | 6.764385  | -8.781953  | -0.629664 | O | 5.235164  | -10.613606 | -0.885029 |
| S | 8.516358  | -8.597504  | -0.551672 | H | 2.181066  | 3.308728   | 0.590175  |
| C | 5.856103  | -7.715587  | -0.538605 | H | -0.308997 | 3.455348   | 0.526334  |
| C | 6.119969  | -6.362743  | -0.375806 | H | -1.694992 | 1.409489   | 0.250640  |
| C | 5.079245  | -5.414646  | -0.302969 | H | -0.622042 | -0.835508  | 0.027533  |
| C | 5.271299  | -4.056057  | -0.141083 | H | 5.593503  | -1.397106  | 0.170656  |
| C | 4.225081  | -3.085015  | -0.066226 | H | 6.294128  | -3.676550  | -0.062741 |
| C | 4.547918  | -1.703593  | 0.100050  | H | 4.060118  | -5.803613  | -0.382898 |
| C | 3.560291  | -0.750726  | 0.173779  | H | 6.703680  | -12.980895 | -1.105002 |
| N | 2.232185  | -1.124842  | 0.083902  | H | 10.997745 | -10.416114 | -0.675322 |
| C | 1.869528  | -2.434854  | -0.074128 | H | 8.906652  | -14.169684 | -1.168700 |
| C | 2.831790  | -3.409005  | -0.148197 | H | 11.028180 | -12.902314 | -0.955873 |
| C | 1.381530  | 0.015126   | 0.186997  | H | 4.418692  | 2.497688   | -0.718437 |
| C | 2.186814  | 1.151509   | 0.344130  | H | 5.486893  | 1.070337   | -0.811231 |
| C | 3.661103  | 0.758056   | 0.350936  | H | 3.990618  | 1.132791   | -1.792738 |
| C | 1.581122  | 2.403473   | 0.467287  | H | 5.398378  | 0.787020   | 1.678632  |
| C | 0.177869  | 2.482777   | 0.431128  | H | 4.326726  | 2.205107   | 1.836300  |
| C | -0.606626 | 1.327273   | 0.274835  | H | 3.837205  | 0.636066   | 2.542925  |
| C | -0.013213 | 0.062210   | 0.148802  | H | 2.499270  | -4.439961  | -0.271705 |
| C | 4.437717  | 1.402281   | -0.823495 | H | 0.803310  | -2.645183  | -0.133158 |
| C | 4.347590  | 1.114004   | 1.692935  | H | 7.149886  | -6.005687  | -0.300038 |
| O | 9.062812  | -7.845368  | -1.702127 | H | 4.806201  | -8.021826  | -0.608418 |

Cartesian coordinates of COSMO optimized S<sub>1</sub> state Al-SO(4) in MeOH:

|   |           |           |           |   |           |           |           |
|---|-----------|-----------|-----------|---|-----------|-----------|-----------|
| C | -3.890585 | 0.302786  | 5.788583  | C | 5.979984  | -1.098950 | -6.801756 |
| C | -2.678006 | 0.247921  | 5.083164  | C | 5.308429  | -1.221181 | -8.033495 |
| C | -1.472317 | 0.323914  | 5.806170  | C | 3.906928  | -1.122259 | -8.103475 |
| C | -1.418967 | 0.450916  | 7.187179  | C | 3.138294  | -0.909041 | -6.951020 |
| C | -2.641918 | 0.505511  | 7.877726  | C | 6.423865  | -1.934553 | -3.642771 |
| C | -3.859098 | 0.431430  | 7.180455  | C | 6.539073  | 0.566828  | -4.011038 |
| S | -0.082203 | 0.230897  | 4.690892  | O | -3.463359 | 0.038182  | 2.797368  |
| C | -1.106420 | 0.099570  | 3.245530  | O | 0.702332  | -0.997689 | 4.922005  |
| C | -2.512635 | 0.118818  | 3.623193  | O | 0.692587  | 1.486999  | 4.701001  |
| C | -0.630547 | 0.004387  | 1.943262  | H | 7.069657  | -1.174057 | -6.760534 |
| C | 0.711435  | -0.014302 | 1.506650  | H | 5.882323  | -1.394969 | -8.945844 |
| C | 1.024763  | -0.106873 | 0.149827  | H | 3.404584  | -1.215635 | -9.068507 |
| C | 2.332675  | -0.154640 | -0.357633 | H | 2.050912  | -0.833798 | -7.004691 |
| C | 2.659322  | -0.275309 | -1.738381 | H | 4.831945  | -0.349049 | -1.437399 |
| C | 1.653516  | -0.313189 | -2.767977 | H | 3.168007  | -0.115448 | 0.347941  |
| C | 1.978712  | -0.472199 | -4.086040 | H | 0.183003  | -0.159503 | -0.543446 |
| N | 3.301666  | -0.606219 | -4.445431 | H | -4.834803 | 0.245094  | 5.247627  |
| C | 4.325554  | -0.554684 | -3.497347 | H | -0.469432 | 0.506772  | 7.718516  |
| C | 4.023920  | -0.386596 | -2.171658 | H | -4.796185 | 0.475452  | 7.736192  |
| C | 3.830252  | -0.801077 | -5.738841 | H | -2.641358 | 0.606054  | 8.962487  |
| C | 5.231732  | -0.884092 | -5.644555 | H | 7.366105  | -2.074409 | -4.193036 |
| C | 5.670166  | -0.703818 | -4.192647 | H | 6.663290  | -1.784752 | -2.579052 |

|   |          |           |           |   |           |           |           |
|---|----------|-----------|-----------|---|-----------|-----------|-----------|
| H | 5.817588 | -2.847899 | -3.742286 | H | 0.596821  | -0.210559 | -2.522306 |
| H | 6.782725 | 0.707239  | -2.946942 | H | 1.243503  | -0.500668 | -4.887456 |
| H | 7.479944 | 0.451715  | -4.570300 | H | 1.526084  | 0.039716  | 2.233056  |
| H | 6.017977 | 1.464674  | -4.376681 | H | -1.411604 | -0.061165 | 1.179364  |

Cartesian coordinates of COSMO optimized  $S_0$  state AI-BA(4) in  $C_6H_6$ :

|   |           |           |            |   |           |           |           |
|---|-----------|-----------|------------|---|-----------|-----------|-----------|
| C | 0.171884  | -0.689805 | -7.897467  | H | -4.734973 | 0.792477  | -7.666667 |
| C | -1.002257 | -0.639937 | -7.147949  | H | -4.890444 | 0.813960  | -5.891455 |
| C | -2.276839 | -0.597248 | -7.727572  | H | -3.524745 | 1.656550  | -6.676406 |
| C | -2.392972 | -0.607263 | -9.115579  | H | -5.019158 | -1.705070 | -5.861324 |
| C | -1.226393 | -0.658930 | -9.895763  | H | -4.867157 | -1.737707 | -7.637476 |
| C | 0.037975  | -0.698584 | -9.291588  | H | -3.748155 | -2.697239 | -6.628734 |
| C | -3.347008 | -0.536095 | -6.642487  | H | 0.292981  | -0.625491 | -2.710653 |
| C | -2.489973 | -0.561049 | -5.381742  | H | 0.863295  | -0.685384 | -5.128013 |
| N | -1.146765 | -0.619626 | -5.735800  | H | -2.763770 | -0.447500 | 1.009003  |
| C | -0.162922 | -0.641539 | -4.775775  | H | -5.758539 | -0.356141 | 0.209563  |
| C | -0.502261 | -0.607730 | -3.454604  | C | -6.725042 | -0.290626 | 2.515199  |
| C | -1.871652 | -0.549138 | -3.020771  | N | -7.116684 | -0.257500 | 3.868058  |
| C | -2.858162 | -0.527819 | -4.066626  | C | -6.228427 | -0.271105 | 4.951236  |
| C | -2.160628 | -0.515248 | -1.639664  | N | -4.868089 | -0.320829 | 4.655964  |
| C | -3.429418 | -0.458282 | -1.042021  | C | -4.318526 | -0.357509 | 3.349892  |
| C | -3.628543 | -0.427883 | 0.344359   | O | -7.590333 | -0.276677 | 1.624366  |
| C | -4.909910 | -0.374581 | 0.902701   | C | -8.557166 | -0.205055 | 4.160065  |
| C | -5.286743 | -0.341176 | 2.254225   | O | -6.619959 | -0.241162 | 6.124671  |
| C | -4.170769 | 0.767678  | -6.722504  | C | -3.951634 | -0.335050 | 5.807413  |
| C | -4.301492 | -1.748916 | -6.693950  | O | -3.079881 | -0.400514 | 3.218791  |
| H | -3.372285 | -0.574712 | -9.595749  | H | -8.672901 | -0.185585 | 5.247168  |
| H | -1.304368 | -0.667307 | -10.982760 | H | -8.995515 | 0.696348  | 3.712245  |
| H | 0.933983  | -0.736487 | -9.911233  | H | -9.055182 | -1.087615 | 3.737589  |
| H | 1.155164  | -0.719754 | -7.429258  | H | -2.935664 | -0.374403 | 5.404468  |
| H | -3.919227 | -0.482563 | -3.823771  | H | -4.089532 | 0.571730  | 6.410683  |
| H | -1.300868 | -0.535591 | -0.965144  | H | -4.148764 | -1.213428 | 6.435328  |
| H | -4.321652 | -0.437115 | -1.678161  |   |           |           |           |

Cartesian coordinates of COSMO optimized  $S_1$  state AI-BA(4) in  $C_6H_6$ :

|   |           |           |           |   |           |           |            |
|---|-----------|-----------|-----------|---|-----------|-----------|------------|
| C | 0.172576  | -0.690649 | -7.906905 | C | -1.842942 | -0.550630 | -3.035664  |
| C | -1.003007 | -0.640373 | -7.150212 | C | -2.843871 | -0.528560 | -4.069460  |
| C | -2.281913 | -0.597945 | -7.732940 | C | -2.157236 | -0.515184 | -1.640471  |
| C | -2.399555 | -0.607918 | -9.118700 | C | -3.431150 | -0.457889 | -1.062387  |
| C | -1.232196 | -0.659775 | -9.902777 | C | -3.635595 | -0.427343 | 0.341217   |
| C | 0.033922  | -0.699676 | -9.299203 | C | -4.913815 | -0.374521 | 0.901915   |
| C | -3.349967 | -0.535807 | -6.645588 | C | -5.282511 | -0.341290 | 2.267799   |
| C | -2.489504 | -0.561288 | -5.387786 | C | -4.173526 | 0.769042  | -6.726102  |
| N | -1.140198 | -0.619689 | -5.750581 | C | -4.308297 | -1.746522 | -6.696856  |
| C | -0.139166 | -0.642352 | -4.789378 | H | -3.379687 | -0.574987 | -9.597628  |
| C | -0.483175 | -0.608168 | -3.462898 | H | -1.311495 | -0.667749 | -10.989598 |

|   |           |           |           |   |           |           |          |
|---|-----------|-----------|-----------|---|-----------|-----------|----------|
| H | 0.928296  | -0.737664 | -9.921461 | N | -7.120320 | -0.258165 | 3.875633 |
| H | 1.156276  | -0.720454 | -7.440081 | C | -6.238399 | -0.270945 | 4.961940 |
| H | -3.902079 | -0.482920 | -3.814238 | N | -4.876564 | -0.320113 | 4.670799 |
| H | -1.304686 | -0.535083 | -0.955690 | C | -4.320694 | -0.356741 | 3.369657 |
| H | -4.318597 | -0.437031 | -1.701909 | O | -7.578684 | -0.276592 | 1.628717 |
| H | -4.737889 | 0.794359  | -7.670540 | C | -8.562824 | -0.207060 | 4.153890 |
| H | -4.892859 | 0.816969  | -5.894632 | O | -6.635625 | -0.240599 | 6.133296 |
| H | -3.526179 | 1.656973  | -6.680938 | C | -3.965145 | -0.333988 | 5.825574 |
| H | -5.026044 | -1.701142 | -5.864095 | O | -3.081082 | -0.398873 | 3.236584 |
| H | -4.874062 | -1.733991 | -7.640493 | H | -8.690597 | -0.186954 | 5.239228 |
| H | -3.757621 | -2.696287 | -6.631882 | H | -8.996340 | 0.693182  | 3.699142 |
| H | 0.313128  | -0.624759 | -2.718905 | H | -9.054569 | -1.090131 | 3.725444 |
| H | 0.883731  | -0.686201 | -5.147933 | H | -2.947383 | -0.372548 | 5.428278 |
| H | -2.769311 | -0.446561 | 1.005553  | H | -4.107410 | 0.572330  | 6.427923 |
| H | -5.765577 | -0.356520 | 0.215291  | H | -4.165255 | -1.212491 | 6.452266 |
| C | -6.721694 | -0.291051 | 2.529164  |   |           |           |          |

Cartesian coordinates of COSMO optimized  $S_0$  state AI-BA(4) in MeOH:

|   |           |           |            |   |           |           |           |
|---|-----------|-----------|------------|---|-----------|-----------|-----------|
| C | 0.194560  | -0.684869 | -7.880888  | H | -4.723858 | 0.777684  | -7.696681 |
| C | -0.989907 | -0.638021 | -7.149515  | H | -4.896601 | 0.792353  | -5.922363 |
| C | -2.259162 | -0.599836 | -7.738119  | H | -3.527911 | 1.648682  | -6.691701 |
| C | -2.362371 | -0.611031 | -9.128471  | H | -5.009503 | -1.715081 | -5.890181 |
| C | -1.185689 | -0.659552 | -9.893246  | H | -4.841765 | -1.755759 | -7.665355 |
| C | 0.074514  | -0.695160 | -9.276364  | H | -3.726680 | -2.706984 | -6.642138 |
| C | -3.338024 | -0.542953 | -6.663648  | H | 0.261941  | -0.613888 | -2.701769 |
| C | -2.492077 | -0.561849 | -5.399465  | H | 0.853557  | -0.674765 | -5.119269 |
| N | -1.150376 | -0.616050 | -5.733427  | H | -2.796941 | -0.448125 | 0.979562  |
| C | -0.174901 | -0.633897 | -4.774779  | H | -5.789649 | -0.351525 | 0.204540  |
| C | -0.527109 | -0.599599 | -3.451972  | C | -6.727801 | -0.284819 | 2.545862  |
| C | -1.896017 | -0.545125 | -3.043325  | N | -7.110284 | -0.252400 | 3.902040  |
| C | -2.874524 | -0.527741 | -4.083521  | C | -6.209956 | -0.271480 | 4.967502  |
| C | -2.201861 | -0.510772 | -1.649938  | N | -4.858447 | -0.327007 | 4.657865  |
| C | -3.467797 | -0.455718 | -1.072575  | C | -4.334424 | -0.363543 | 3.341011  |
| C | -3.671557 | -0.426638 | 0.328280   | O | -7.613040 | -0.263440 | 1.662572  |
| C | -4.937319 | -0.372961 | 0.892574   | C | -8.548904 | -0.194904 | 4.208765  |
| C | -5.306234 | -0.340796 | 2.264326   | O | -6.588414 | -0.240289 | 6.152349  |
| C | -4.169174 | 0.756625  | -6.746993  | C | -3.923117 | -0.347888 | 5.795441  |
| C | -4.285360 | -1.762168 | -6.716715  | O | -3.089152 | -0.412078 | 3.195786  |
| H | -3.336200 | -0.582260 | -9.619384  | H | -8.658447 | -0.175785 | 5.295774  |
| H | -1.251422 | -0.668544 | -10.981107 | H | -8.988019 | 0.710438  | 3.770566  |
| H | 0.976477  | -0.730723 | -9.887113  | H | -9.054245 | -1.077023 | 3.795306  |
| H | 1.171594  | -0.711314 | -7.399973  | H | -2.912895 | -0.391688 | 5.380906  |
| H | -3.937374 | -0.485153 | -3.848794  | H | -4.043064 | 0.560237  | 6.399707  |
| H | -1.343836 | -0.529961 | -0.973120  | H | -4.111334 | -1.228131 | 6.423067  |
| H | -4.355501 | -0.434372 | -1.714548  |   |           |           |           |

Cartesian coordinates of COSMO optimized  $S_1$  state AI-BA(4) in MeOH:

|   |           |           |            |   |           |           |           |
|---|-----------|-----------|------------|---|-----------|-----------|-----------|
| C | 0.191287  | -0.684868 | -7.893279  | H | -4.730140 | 0.775778  | -7.707985 |
| C | -0.992596 | -0.637880 | -7.149580  | H | -4.904147 | 0.796518  | -5.932898 |
| C | -2.266607 | -0.600594 | -7.743555  | H | -3.534357 | 1.648621  | -6.704599 |
| C | -2.372123 | -0.612002 | -9.131324  | H | -5.020488 | -1.713089 | -5.899263 |
| C | -1.196363 | -0.660243 | -9.902853  | H | -4.852408 | -1.748747 | -7.675276 |
| C | 0.065624  | -0.695408 | -9.287199  | H | -3.740335 | -2.706005 | -6.654328 |
| C | -3.344785 | -0.542843 | -6.667207  | H | 0.291398  | -0.614819 | -2.714283 |
| C | -2.496721 | -0.562057 | -5.401610  | H | 0.874738  | -0.674843 | -5.136339 |
| N | -1.144119 | -0.615753 | -5.750164  | H | -2.782116 | -0.449134 | 0.968684  |
| C | -0.150611 | -0.634025 | -4.783873  | H | -5.792902 | -0.350196 | 0.225554  |
| C | -0.501140 | -0.600406 | -3.461879  | C | -6.724916 | -0.284448 | 2.554386  |
| C | -1.870228 | -0.546511 | -3.044034  | N | -7.115635 | -0.251947 | 3.899794  |
| C | -2.865666 | -0.528902 | -4.086933  | C | -6.223753 | -0.271259 | 4.974061  |
| C | -2.185222 | -0.511458 | -1.658325  | N | -4.866978 | -0.326158 | 4.675661  |
| C | -3.471234 | -0.455906 | -1.075974  | C | -4.325888 | -0.362599 | 3.370912  |
| C | -3.660782 | -0.427247 | 0.320713   | O | -7.591667 | -0.265451 | 1.655852  |
| C | -4.937039 | -0.372287 | 0.906413   | C | -8.558122 | -0.194799 | 4.188860  |
| C | -5.292078 | -0.340308 | 2.274811   | O | -6.612343 | -0.241594 | 6.154205  |
| C | -4.176229 | 0.756592  | -6.757247  | C | -3.948216 | -0.346468 | 5.827783  |
| C | -4.296079 | -1.759115 | -6.726044  | O | -3.082573 | -0.410698 | 3.227760  |
| H | -3.347446 | -0.583237 | -9.619960  | H | -8.683180 | -0.175571 | 5.273841  |
| H | -1.265278 | -0.669154 | -10.990486 | H | -8.990002 | 0.709932  | 3.742392  |
| H | 0.965845  | -0.730759 | -9.901040  | H | -9.055821 | -1.077044 | 3.766503  |
| H | 1.170344  | -0.711073 | -7.416469  | H | -2.931098 | -0.389833 | 5.431392  |
| H | -3.926458 | -0.486938 | -3.841581  | H | -4.080939 | 0.561461  | 6.429549  |
| H | -1.334514 | -0.529549 | -0.971566  | H | -4.148617 | -1.226474 | 6.451903  |
| H | -4.357023 | -0.434873 | -1.717692  |   |           |           |           |

Cartesian coordinates of COSMO optimized  $S_0$  state AI-TBA(4) in  $C_6H_6$ :

|   |           |           |           |   |           |           |            |
|---|-----------|-----------|-----------|---|-----------|-----------|------------|
| C | 0.186144  | -0.685566 | -7.889256 | C | -4.170206 | 0.759209  | -6.736185  |
| C | -0.990659 | -0.635197 | -7.144301 | C | -4.284727 | -1.758288 | -6.698370  |
| C | -2.263474 | -0.599245 | -7.728270 | H | -3.352886 | -0.589065 | -9.600103  |
| C | -2.375182 | -0.615681 | -9.116534 | H | -1.280236 | -0.678193 | -10.979715 |
| C | -1.205765 | -0.666163 | -9.892255 | H | 0.954590  | -0.737396 | -9.900841  |
| C | 0.056706  | -0.699981 | -9.283927 | H | 1.167944  | -0.711515 | -7.417741  |
| C | -3.337708 | -0.538845 | -6.648010 | H | -3.924960 | -0.481083 | -3.836885  |
| C | -2.484618 | -0.552673 | -5.384385 | H | -1.337790 | -0.534056 | -0.958153  |
| N | -1.141080 | -0.609771 | -5.731488 | H | -4.349766 | -0.429051 | -1.706775  |
| C | -0.163992 | -0.631135 | -4.765901 | H | -4.730906 | 0.776641  | -7.682864  |
| C | -0.512240 | -0.598753 | -3.445939 | H | -4.893665 | 0.802847  | -5.908182  |
| C | -1.883941 | -0.542654 | -3.022400 | H | -3.530693 | 1.653081  | -6.690427  |
| C | -2.862317 | -0.521689 | -4.072120 | H | -5.007439 | -1.715066 | -5.869979  |
| C | -2.189067 | -0.511956 | -1.643021 | H | -4.845852 | -1.752804 | -7.644783  |
| C | -3.465170 | -0.454743 | -1.061940 | H | -3.727509 | -2.703962 | -6.627439  |
| C | -3.673078 | -0.429402 | 0.325231  | H | 0.278665  | -0.616087 | -2.697385  |
| C | -4.950106 | -0.374959 | 0.887254  | H | 0.864415  | -0.674807 | -5.111725  |
| C | -5.308981 | -0.345930 | 2.248391  | H | -2.808473 | -0.454075 | 0.988332   |

|   |           |           |          |   |           |           |          |
|---|-----------|-----------|----------|---|-----------|-----------|----------|
| H | -5.804861 | -0.350513 | 0.203540 | C | -3.863629 | -0.354680 | 5.740480 |
| C | -6.726583 | -0.289021 | 2.545092 | O | -3.101098 | -0.420792 | 3.153292 |
| N | -7.099298 | -0.254855 | 3.911806 | H | -8.710021 | -0.178527 | 5.238258 |
| C | -6.198644 | -0.270886 | 4.971385 | H | -8.963273 | 0.707566  | 3.688792 |
| N | -4.853424 | -0.330730 | 4.649426 | H | -9.031379 | -1.075432 | 3.707113 |
| C | -4.332146 | -0.369964 | 3.318371 | H | -2.877354 | -0.400924 | 5.270711 |
| O | -7.608146 | -0.269075 | 1.670110 | H | -3.961221 | 0.550256  | 6.353248 |
| C | -8.551489 | -0.196243 | 4.156481 | H | -4.032522 | -1.231271 | 6.378556 |
| S | -6.690801 | -0.220805 | 6.586556 |   |           |           |          |

Cartesian coordinates of COSMO optimized  $S_0$  state AI-TBA(4) in MeOH

|   |           |           |            |   |           |           |           |
|---|-----------|-----------|------------|---|-----------|-----------|-----------|
| C | 0.199719  | -0.682575 | -7.880090  | H | -4.718626 | 0.782253  | -7.701620 |
| C | -0.986121 | -0.635750 | -7.151092  | H | -4.887870 | 0.801636  | -5.926818 |
| C | -2.254511 | -0.598319 | -7.741295  | H | -3.518003 | 1.652139  | -6.701008 |
| C | -2.355645 | -0.610952 | -9.131732  | H | -5.007051 | -1.709231 | -5.893607 |
| C | -1.177656 | -0.659683 | -9.894360  | H | -4.842381 | -1.748978 | -7.669279 |
| C | 0.081756  | -0.693928 | -9.275812  | H | -3.727274 | -2.703304 | -6.648306 |
| C | -3.334644 | -0.540087 | -6.668679  | H | 0.254367  | -0.618692 | -2.700256 |
| C | -2.491139 | -0.560595 | -5.403766  | H | 0.852628  | -0.675455 | -5.117504 |
| N | -1.149708 | -0.614655 | -5.734381  | H | -2.806265 | -0.451584 | 0.971195  |
| C | -0.176585 | -0.634718 | -4.775230  | H | -5.797344 | -0.357441 | 0.198405  |
| C | -0.532402 | -0.603207 | -3.452463  | C | -6.716985 | -0.292931 | 2.562023  |
| C | -1.900588 | -0.547693 | -3.048088  | N | -7.095495 | -0.255156 | 3.928617  |
| C | -2.876353 | -0.528758 | -4.087596  | C | -6.196148 | -0.268919 | 4.981759  |
| C | -2.210235 | -0.513274 | -1.652463  | N | -4.855988 | -0.327802 | 4.662753  |
| C | -3.475119 | -0.458044 | -1.082050  | C | -4.342850 | -0.366842 | 3.326588  |
| C | -3.681618 | -0.429885 | 0.321955   | O | -7.610975 | -0.277667 | 1.687524  |
| C | -4.945186 | -0.377817 | 0.884881   | C | -8.548681 | -0.195969 | 4.171104  |
| C | -5.310992 | -0.345917 | 2.262896   | S | -6.690745 | -0.215684 | 6.608210  |
| C | -4.162336 | 0.761929  | -6.752870  | C | -3.862967 | -0.351207 | 5.752141  |
| C | -4.284495 | -1.757386 | -6.721502  | O | -3.104078 | -0.416549 | 3.162369  |
| H | -3.328616 | -0.583483 | -9.624196  | H | -8.711973 | -0.175160 | 5.251026  |
| H | -1.242099 | -0.670163 | -10.982482 | H | -8.959690 | 0.708272  | 3.704523  |
| H | 0.984590  | -0.729318 | -9.885364  | H | -9.028119 | -1.077975 | 3.727994  |
| H | 1.176088  | -0.708292 | -7.397979  | H | -2.876302 | -0.397729 | 5.284857  |
| H | -3.939562 | -0.485574 | -3.854560  | H | -3.955809 | 0.555656  | 6.362327  |
| H | -1.353190 | -0.532279 | -0.974460  | H | -4.027612 | -1.229278 | 6.388819  |
| H | -4.360235 | -0.435362 | -1.725471  |   |           |           |           |
